# Supplementary material
Source: PubMed Central journal article supplement (PMC2776411)
Supplement: 0908504106_0908504106SI.pdf [file 0908504106_0908504106SI.pdf]

# Supporting Information

Borenstein and Frenkel 10.1073/pnas.0908504106

## SI Text

**Transfection of SupT1 Cells with HHV-6A-BAC.** One day prior transfection, the growth medium was replaced by fresh medium and cells were kept at low density to avoid stress. The transfection was by applying 6  $\mu$ g HHV-6A-BAC DNA to  $0.5 \times 10^6$  cells, using the MP-100 microporator device, in a 100- $\mu$ L gold-tip, as recommended by the manufacturer. The electroporation parameters were two pulses of 1,100 V with pulse width of 30 ms.

**Transfection of 293T Cells with HHV-6A-BAC.** The 293T cells were propagated in DMEM, 10% (FCS), 2 mM L-glutamine, and pen-strep-nistatin. The transfection was performed employing Lipofectamine (Invitrogen) by the manufacturer's instructions. For stable transfection, the cells were maintained in the medium above plus 1  $\mu$ g puromycin/mL (Sigma Chemical).

**Pulse-Field Gel Electrophoresis.** DNA samples were loaded into gel wells along with DNA size ladder: 15–300-kb DNA ladder (Midrange I, New England BioLabs) and 0.25–10-kb ladder (Perfect Plus, 1 kb EURx). Pulse-field gel electrophoresis was conducted using the Counterclamped Homogeneous Electric Field (CHEF) apparatus (Bio-Rad), in 14 °C. Running parameters were 18 h, 6 V/cm, 120°. Switch times were 1–25 s. The gel was stained with 1  $\mu$ g/mL EtBr, visualized with UV light, and photographed.

**Southern Blot Analyses of HHV-6A-BAC with the pac-2-pac-1 Junction Probe.** The HHV-6A-BAC DNA was analyzed by blot hybridizations using a 130-bp probe with sequences of the pac-2 and pac-1 signals. This probe detects sequences from the termini as well as DRR-DRL junctions. The pac-2-pac-1 probe was generated by PCR of total HHV-6A (U1102) DNA as the template with the primers: pac-1 starting at 52 bp anti-sense: 5'cccccccttttttagcccccccggg'3 and pac-2 starting at 159,244 bp sense: 5'cccccaacgcgcgcgcac'3.

**Direct Cloning of the Intact HHV-6A DNA into BAC.** The pIndigoBAC-5 was modified to abolish one *NotI* site and the *SfiI* site (Fig. S1B). The mutation was introduced by PCR using the primer pairs 5'gaacccttgcgAccgcccAgccgctc'3 and 5'gacggcTggcgTcgcaaggggttc'3 (capital letters denote the mutations). The resultant pNF1254 clone contained a single *NotI* site at position 2 of the original BAC-5 vector and no *SfiI* sites. An ampicillin/puromycin (amp/puro) cassette was prepared by PCR, employing the pMSCV plasmid (Clontech). PCR of the puro segment was done (Fig. 1C) employing sense and anti-sense primer pairs, with a *NotI* site at the 5' terminus and a *MluI* site at the 3' terminus 5'ATAAGAATgcgccgcCGAATTCTACCGGGTAGGG'3 and 5'ACGacgcgtTGCCAAACCTACAGGTGG'3 (in this and other sequences below lowercase letters correspond to the restriction enzyme sites). PCR of the amp segment was done employing a primer pair containing a *NotI* site at the 5' terminus and *MluI* site at the 3' terminus, corresponding to 5'ATAAGAATgcgccgcCTTAGACGTCAGGTGGCAC'3

and 5'ACGacgcgtGGTCTGACAGTTACCAATGC'3. The puro and the amp PCR products were digested with *MluI* and then ligated to form the amp/puro cassette, flanked by the *NotI* sites (Fig. S1C). The cassette digested with *NotI* was cloned into the *NotI* of pNF1254, yielding the pNF1255 plasmid (Fig. S1D). The EGFP gene was made by PCR from pEGFP-C3 (Clontech) employing primer pairs with a *BstEII* site at the 5' terminus: TTGggttaccCCTGCAGCCCTAATAGTAATCA and 5'TT-GggttaccCGCTTACAATTTACGCGTTAAG'3. The PCR fragment was blunted by the Klenow reaction and ligated into the *HpaI* site of pNF1255, generating pNF1266 (Fig. S1E). Finally, a DNA fragment with *BamHI-SfiI-LoxP* and *HindIII* sites was produced by annealing the oligonucleotides: 5'gateC-TTCTTggccacctggccTTGCTTGGCGCGCCGTataactcgtatagcatacattatcgaagttatTT'3 and 5'AGCTAAataactcgtataatgatgctatcgaagttatACGGCGCGCCAAGCAAggcccaggtggccAA-GAAG'3 (the lowercase letters denote restriction enzyme sites and *LoxP* sites). The oligomer was ligated with the pNF1266 plasmid, cleaved with *BamHI* and *HindIII*. This generated the BAC-amp-puro-GFP (pNF1267) vector (Fig. S1), containing the *SfiI* site matching the *SfiI* site of HHV-6A DNA and *LoxP* sequence. The pNF1267 vector was digested with *SfiI*, dephosphorylated, and ligated with the *SfiI*-cleaved HHV-6A DNA prepared by the Hirt procedure. The ligation produced several colonies tested by PCR.

**Screening of the HHV-6A-BAC Clones.** The BAC clones were transferred into 96-well plates containing 200  $\mu$ L LB, supplemented with 7% glycerol. After 2 h incubation, they were screened by PCR, employing six pairs of test primers: (i) primers for BAC (B) positions 2,189–2,573, expected to yield a 384-bp PCR product. The BAC primers corresponded to sense: 5'TGCCTGCAAGCGGTAACGA'3 and anti-sense 5'ACACCTTCTAGAACAGC'3. (ii) A set of primers from the left part of the genome, positions 15,000–15,602, yielding a 602-bp PCR product. The primer sequences were 5'CCCATTC AACATCTATTGA'3 and 5'CCGGAAAGACCATTGCCG'3. (iii) A set of primers corresponding to the middle part of the genome, positions 75,208–75,536, yielding a 328-bp PCR product. The sequences of the primers were 5'GCGCTGTACATTTTTC-CAG'3 and 5'CTTCAC CGTCTCTGAAGCA'3. (iv) A set of primers corresponding to the right part of the genome, positions 134,263–134,591 and yielding a 328-bp PCR product. The sequences of the primers were 5'TTCTCCAGATGTGCCAGG-GAAATCC'3 and 5'CATCATTGTTATCGCTTTCAC-TCTC'3. (v) Primers of the amp/puro cassette, yielding a 2,268-bp PCR product. The primers corresponded to 5'ATAA-GAATgcgccgc CTTAGACGTCAGGTGGCAC'3 and 5'ATAAGAATTTCTACGGGTAGGG'3. (vi) Primers for the detection of the EGFP cassette, yielding a 1,425-bp PCR product. The primer sequences were 5'tgggttaccCCTGCAGC-CCTAATAGTAATCA'3 and 5'tgggttaccCGCTTACAATT-TACGCGTTAAG'3. All PCR tests gave the expected sizes and the clones were designated HHV-6A-BAC (pNF1268), carrying the intact viral genome.

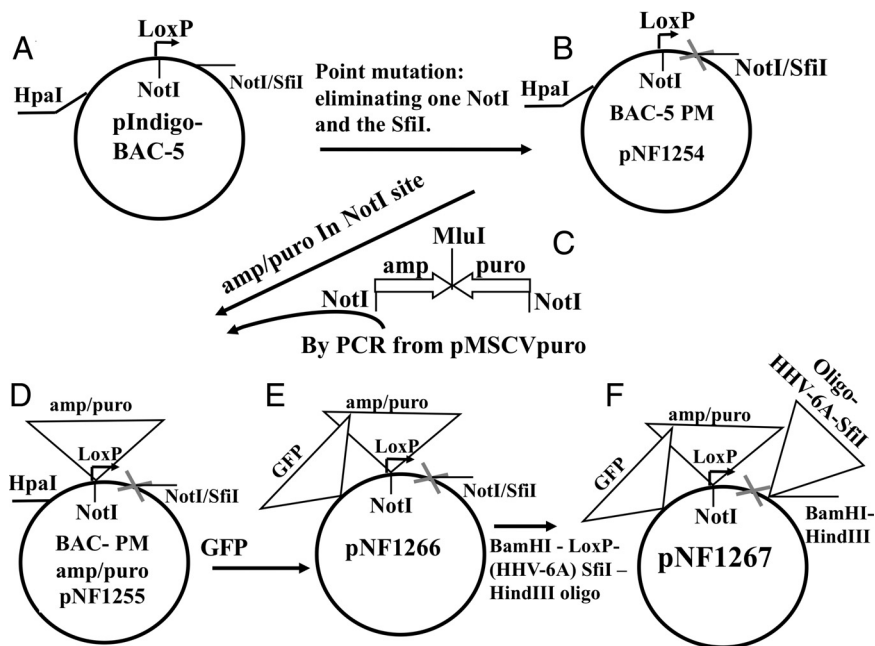

**Fig. S1.** Derivation of the BAC clone pNF1267. The pIndigoBAC-5 was modified as follows: (A) Sites in the original pIndigoBAC-5, purchased from EPICENTRE Technologies. (B) One of the two *NotI* sites and the *SfiI* site were eliminated by point mutations. (C) The amp/puro cassette was synthesized from pMSCV-puro by PCR of the amp and puro genes with primers containing the *NotI* and *MluI* sites. The amp and puro genes were then linked at the *MluI* site, producing a cassette flanked by *NotI* sites. (D) The amp/puro cassette was inserted into the remaining single *NotI* site. (E) The GFP gene driven by the CMV promoter was introduced into the *HpaI* site of pNF1255, yielding pNF1266. (F) An oligonucleotide containing the *LoxP* sequence, *SfiI* site matching the HHV-6A *SfiI* site, and *BamHI* and *HindIII* complementing sequences was ligated into the *BamHI-HindIII* sites of the pNF1266. This produced the BAC-amp-puro-GFP, pNF1267 vector with the desired sites.
